# Supplementary material for: Exploiting the potential of aryl acetamide derived Zn(ii) complexes in medicinal chemistry: synthesis, structural analysis, assessment of biological profile and molecular docking studies
Source: Royal Society of Chemistry journal article supplement (doi:10.1039/c5nj03531g), 2016-01-01
Supplement: c5nj03531g1.pdf [file c5nj03531g1.pdf]

**Exploiting the potential of aryl acetamide derived Zn(II) complexes in medicinal chemistry: Synthesis, structural analysis, assessment of biological profile and molecular docking studies**

Kishwar Sultana,<sup>a†</sup> Sumera Zaib,<sup>b†</sup> Najm ul Hassan Khan,<sup>c</sup> Imtiaz Khan,<sup>d</sup> Khadija Shahid,<sup>e</sup> Jim Simpson<sup>f</sup> and Jamshed Iqbal<sup>b\*</sup>

*<sup>a</sup>Faculty of Pharmacy, The University of Lahore, Lahore, Pakistan*

*<sup>b</sup>Centre for Advanced Drug Research, COMSATS Institute of Information Technology, Abbottabad-22060, Pakistan*

*<sup>c</sup>Islam College of Pharmacy, Pasrur Road, Sialkot, Pakistan*

*<sup>d</sup>Department of Chemistry, Quaid-i-Azam University, Islamabad-45320, Pakistan*

*<sup>e</sup>Riphah Institute of Pharmaceutical Sciences, Riphah International University Islamabad-44000 Pakistan*

*<sup>f</sup>Department of Chemistry, University of Otago, PO Box 56, Dunedin 9054, New Zealand*

*<sup>†</sup>These authors contributed equally to this work.*

**To whom Correspondence should address:**

**Prof. Dr. Jamshed Iqbal**

Centre for Advanced Drug Research, COMSATS Institute of Information Technology,  
Abbottabad-22060, Pakistan

Tel.: +92 992 383591/96; Fax: +92 992 383441. E-mail: [drjamshed@ciit.net.pk](mailto:drjamshed@ciit.net.pk)

**Table S1.** Atomic coordinates ( $\times 10^4$ ) and equivalent isotropic displacement parameters ( $\text{\AA}^2 \times 10^3$ ) for **4c**.  $U(\text{eq})$  is defined as one third of the trace of the orthogonalized  $U^{ij}$  tensor.

|       | <b>x</b> | <b>y</b> | <b>z</b> | <b>U(eq)</b> |
|-------|----------|----------|----------|--------------|
| Zn(1) | 5000     | 11552(1) | 1671(1)  | 20(1)        |
| Cl(1) | 5000     | 11532(1) | -252(1)  | 31(1)        |
| Cl(2) | 5000     | 13536(1) | 2416(1)  | 30(1)        |
| O(1)  | 4141(1)  | 10382(2) | 2190(2)  | 26(1)        |
| O(2)  | 2999(1)  | 5294(2)  | -55(2)   | 28(1)        |
| N(1)  | 3156(1)  | 9354(2)  | 3101(2)  | 24(1)        |
| C(1)  | 3127(2)  | 8291(2)  | 2308(3)  | 22(1)        |
| C(2)  | 3803(1)  | 7592(3)  | 2071(3)  | 26(1)        |
| C(3)  | 3783(2)  | 6567(2)  | 1301(3)  | 25(1)        |
| C(4)  | 3074(1)  | 6251(3)  | 761(3)   | 22(1)        |
| C(5)  | 2383(2)  | 6928(3)  | 1025(2)  | 25(1)        |
| C(6)  | 2413(1)  | 7952(2)  | 1797(2)  | 25(1)        |
| C(7)  | 3695(2)  | 11261(3) | 4010(3)  | 29(1)        |
| C(8)  | 3678(1)  | 10315(2) | 3031(2)  | 23(1)        |
| C(9)  | 3700(2)  | 4593(3)  | -376(3)  | 33(1)        |

**Table S2.** Bond lengths [Å] and angles [°] for **4c**.

|                                |            |                  |          |
|--------------------------------|------------|------------------|----------|
| Zn(1)-O(1)                     | 1.9834(18) | C(3)-C(4)        | 1.391(4) |
| Zn(1)-O(1) <sup>i</sup>        | 1.9834(18) | C(3)-H(3)        | 0.9500   |
| Zn(1)-Cl(1)                    | 2.2212(10) | C(4)-C(5)        | 1.394(4) |
| Zn(1)-Cl(2)                    | 2.2263(9)  | C(5)-C(6)        | 1.386(4) |
| O(1)-C(8)                      | 1.248(3)   | C(5)-H(5)        | 0.9500   |
| O(2)-C(4)                      | 1.373(3)   | C(6)-H(6)        | 0.9500   |
| O(2)-C(9)                      | 1.436(3)   | C(7)-C(8)        | 1.496(4) |
| N(1)-C(8)                      | 1.332(3)   | C(7)-H(7A)       | 0.9800   |
| N(1)-C(1)                      | 1.432(3)   | C(7)-H(7B)       | 0.9800   |
| N(1)-H(1)                      | 0.791(13)  | C(7)-H(7C)       | 0.9800   |
| C(1)-C(2)                      | 1.381(4)   | C(9)-H(9A)       | 0.9800   |
| C(1)-C(6)                      | 1.388(4)   | C(9)-H(9B)       | 0.9800   |
| C(2)-C(3)                      | 1.385(4)   | C(9)-H(9C)       | 0.9800   |
| C(2)-H(2)                      | 0.9500     |                  |          |
| O(1)-Zn(1)-O(1) <sup>i</sup>   | 94.12(11)  | C(4)-C(3)-H(3)   | 120.4    |
| O(1)-Zn(1)-Cl(1)               | 107.23(6)  | O(2)-C(4)-C(3)   | 123.8(2) |
| O(1) <sup>i</sup> -Zn(1)-Cl(1) | 107.23(6)  | O(2)-C(4)-C(5)   | 115.9(2) |
| O(1)-Zn(1)-Cl(2)               | 116.52(5)  | C(3)-C(4)-C(5)   | 120.3(2) |
| O(1) <sup>i</sup> -Zn(1)-Cl(2) | 116.52(5)  | C(6)-C(5)-C(4)   | 119.7(2) |
| Cl(1)-Zn(1)-Cl(2)              | 113.27(4)  | C(6)-C(5)-H(5)   | 120.2    |
| C(8)-O(1)-Zn(1)                | 136.68(16) | C(4)-C(5)-H(5)   | 120.2    |
| C(4)-O(2)-C(9)                 | 117.8(2)   | C(5)-C(6)-C(1)   | 119.9(2) |
| C(8)-N(1)-C(1)                 | 123.9(2)   | C(5)-C(6)-H(6)   | 120.1    |
| C(8)-N(1)-H(1)                 | 111(2)     | C(1)-C(6)-H(6)   | 120.1    |
| C(1)-N(1)-H(1)                 | 125(2)     | C(8)-C(7)-H(7A)  | 109.5    |
| C(2)-C(1)-C(6)                 | 120.2(2)   | C(8)-C(7)-H(7B)  | 109.5    |
| C(2)-C(1)-N(1)                 | 120.0(2)   | H(7A)-C(7)-H(7B) | 109.5    |
| C(6)-C(1)-N(1)                 | 119.8(2)   | C(8)-C(7)-H(7C)  | 109.5    |
| C(1)-C(2)-C(3)                 | 120.6(2)   | H(7A)-C(7)-H(7C) | 109.5    |
| C(1)-C(2)-H(2)                 | 119.7      | H(7B)-C(7)-H(7C) | 109.5    |
| C(3)-C(2)-H(2)                 | 119.7      | O(1)-C(8)-N(1)   | 120.3(2) |
| C(2)-C(3)-C(4)                 | 119.3(2)   | O(1)-C(8)-C(7)   | 122.6(2) |
| C(2)-C(3)-H(3)                 | 120.4      | N(1)-C(8)-C(7)   | 117.1(2) |

**Supporting Information**

|                  |       |                  |       |
|------------------|-------|------------------|-------|
| O(2)-C(9)-H(9A)  | 109.5 | O(2)-C(9)-H(9C)  | 109.5 |
| O(2)-C(9)-H(9B)  | 109.5 | H(9A)-C(9)-H(9C) | 109.5 |
| H(9A)-C(9)-H(9B) | 109.5 | H(9B)-C(9)-H(9C) | 109.5 |

---

Symmetry transformations used to generate equivalent atoms:  $i = -x+1, y, z$

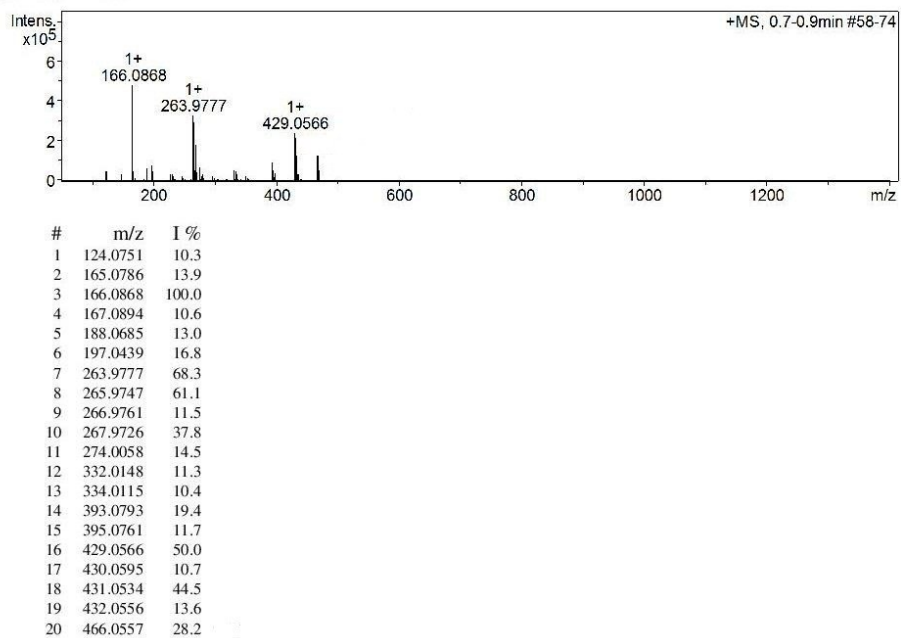

Figure S1. Mass spectrum of complex 4c.

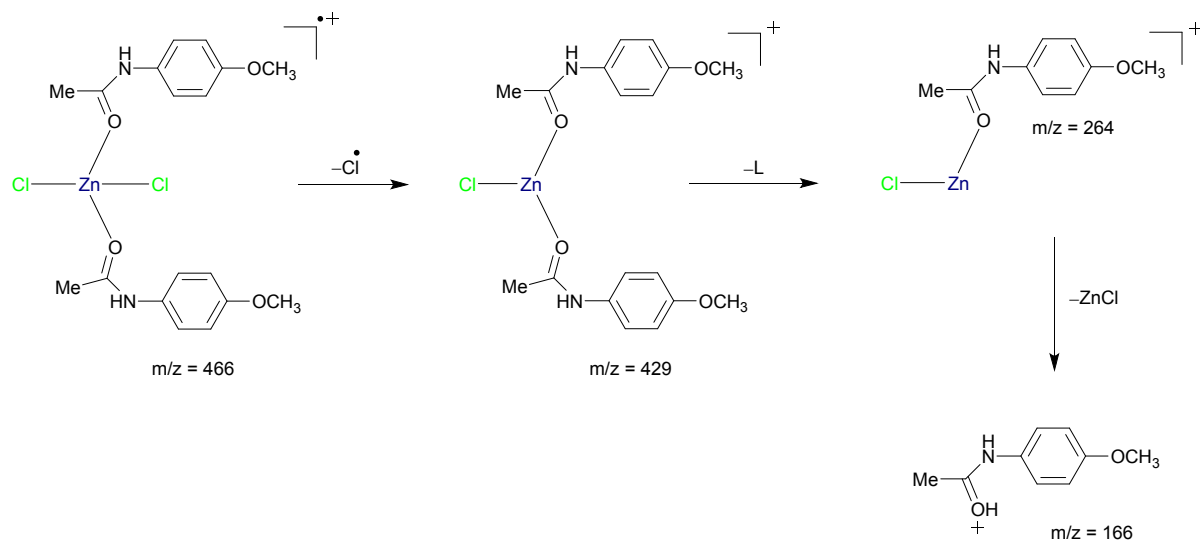

Figure S2. Proposed mass fragmentation pattern for complex 4c.

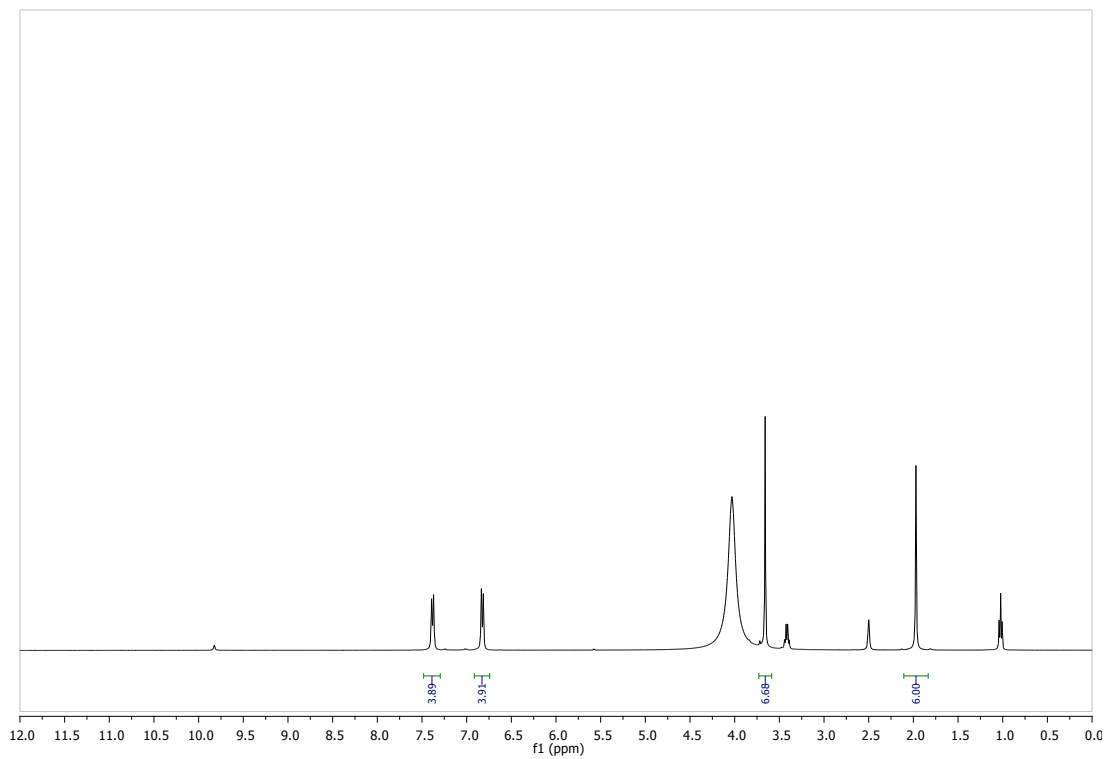

**Figure S3.**  $^1\text{H}$  NMR spectrum of complex **4c** at room temperature (400 MHz,  $\text{DMSO-d}_6/\text{D}_2\text{O}$ ).

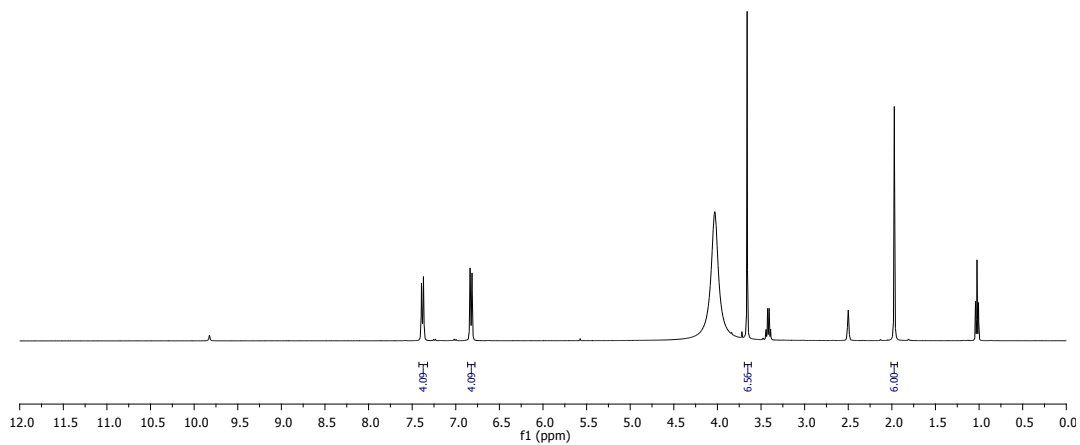

**Figure S4.**  $^1\text{H}$  NMR spectrum of complex **4c** at room temperature after 48 h (400 MHz,  $\text{DMSO-d}_6/\text{D}_2\text{O}$ ).
